# Supplementary material for: Uranyl N2O2-Schiff base complex as co-catalyst in ethanol electro-oxidation: synthesis, crystallographic, spectroscopic, electrochemical, and DFT characterization, and catalytic investigation
Source: Royal Society of Chemistry journal article supplement (doi:10.1039/d3nj01561k), 2023-01-01
Supplement: d3nj01561k1.pdf [file d3nj01561k1.pdf]

## Supplementary Material

### Uranyl N<sub>2</sub>O<sub>2</sub>-Schiff Base Complex as Co-catalyst in Ethanol Electro-oxidation: Synthesis, Crystallographic, Spectroscopic, Electrochemical, and DFT Characterization, and Catalytic Investigation

Elizomar Medeiros Barbosa<sup>a</sup>; Kaique Souza Soares<sup>a</sup>; Thiago Henrique Döring<sup>b</sup>, Igor Vinicius de França<sup>b</sup>, Lucas dos S. Mello<sup>c</sup>, Glaucio R. Nagurniak<sup>d</sup>, Renato L. T. Parreira<sup>e</sup>; Felipe T. Martins<sup>f</sup>; Edward Ralph Dockal<sup>c</sup>; Elson Almeida Souza<sup>a</sup>; Paulo José Sousa Maia<sup>g\*</sup>; José Wilmo da Cruz Jr.\*<sup>b</sup>

<sup>a</sup>Instituto de Ciências Exatas e tecnologia, Universidade Federal do Amazonas, Itacoatiara, AM, Brazil;

<sup>b</sup>Departamento de Ciências Exatas e Educação, Universidade Federal de Santa Catarina, Rua João Pessoa 2514, Blumenau, SC, Brazil;

<sup>c</sup>Departamento de Química, Universidade Federal de São Carlos, Rod. Washington Luiz, km 235, São Carlos, SP, Brazil;

<sup>d</sup>Department of Chemistry, State University of Ponta Grossa, Ponta Grossa - PR, 84030-900, Brazil.

<sup>e</sup>Center of research in exact sciences and technologies, University of Franca, Franca - SP, 14404-600, Brazil.

<sup>f</sup>UFG, Universidade Federal de Goiás, Instituto de Química, Goiânia - GO, 74690-900, Brazil.

<sup>g</sup>GEQBio: Grupo de Eletrocatalise, Fotoquímica Inorgânica e Química Bioinorgânica, Instituto Multidisciplinar de Química, Centro Multidisciplinar

## List of Tables

|                                                                                                                                                                                                                                                                                |   |
|--------------------------------------------------------------------------------------------------------------------------------------------------------------------------------------------------------------------------------------------------------------------------------|---|
| <b>Table S1.</b> $^1\text{H}$ (400 MHz) and $^{13}\text{C}$ (100 MHz) data of $\text{H}_2\text{L}$ and $[\text{UO}_2(\text{L})\text{H}_2\text{O}]$ in $\text{DMSO-}d_6$ (25 °C) with tetramethylsilane (TMS), as internal standard (chemical shifts in ppm and $J$ in Hz)..... | 4 |
| <b>Table S2.</b> Experimental (190-800 nm, Acetonitrile, 25°C) and theoretical (ZORA-PBE/Def2-TZVPP-3BJ//SARC-TZVPP - SMD-Acetonitrile) UV-Vis attribution ( $\lambda$ in nm and $\epsilon$ in $\text{L}\cdot\text{mol}^{-1}\cdot\text{cm}^{-1}$ )....                         | 8 |

## List of Figures

|                                                                                                                                                                                                                |    |
|----------------------------------------------------------------------------------------------------------------------------------------------------------------------------------------------------------------|----|
| Figure S1. $^1\text{H}$ NMR spectrum (400 MHz, $\text{DMSO-}d_6$ ) of 3-OMe- <i>c</i> -salcn. ...                                                                                                              | 5  |
| Figure S2. $^{13}\text{C}$ NMR spectrum (100 MHz, $\text{DMSO-}d_6$ ) of 3-OMe- <i>c</i> -salcn....                                                                                                            | 5  |
| Figure S3. Infrared spectra ( $4000\text{-}450\text{ cm}^{-1}$ , KBr) $[\text{UO}_2(3\text{OMe-}c\text{-salcn})\text{H}_2\text{O}]$ . ....                                                                     | 6  |
| Figure S4. $^1\text{H}$ NMR spectrum (400 MHz, $\text{DMSO-}d_6$ ) of $[\text{UO}_2(3\text{OMe-}c\text{-salcn})\text{H}_2\text{O}]$ . ....                                                                     | 6  |
| Figure S5. $^{13}\text{C}$ NMR spectrum (400 MHz, $\text{DMSO-}d_6$ ) of $[\text{UO}_2(3\text{OMe-}c\text{-salcn})\text{H}_2\text{O}]$ . ....                                                                  | 7  |
| Figure S6. Optimized geometry of <i>cis</i> - $[\text{UO}_2(3\text{-OMe-}c\text{-salcn})(\text{H}_2\text{O})]$ at DKH-PBE/Def2-TZVPP-D3BJ//SARC-TZVPP level of theory.....                                     | 7  |
| Figure S7. Optimized geometry of <i>trans</i> - $[\text{UO}_2(3\text{-OMe-}c\text{-salcn})(\text{H}_2\text{O})]$ at DKH-PBE/Def2-TZVPP-D3BJ//SARC-TZVPP level of theory.....                                   | 8  |
| Figure S8. $[\text{UO}_2(3\text{-OMe-}c\text{-salcn})\text{H}_2\text{O}]$ UV-Vis electronic spectra (200-800 nm, acetonitrile, 25°C).....                                                                      | 9  |
| Figure S9. Gaussian analysis of $[\text{UO}_2(3\text{-OMe-}c\text{-salcn})\text{H}_2\text{O}]$ for electronic spectrum in the $50000\text{-}20000\text{ cm}^{-1}$ (200-500 nm, Acetonitrile, 25°C) region..... | 10 |
| Figure S10. UV-VIS spectrum of $[\text{UO}_2(3\text{-OMe-}c\text{-salcn})\text{H}_2\text{O}]$ calculated at ZORA-PBE/Def2-TZVPP-3BJ//SARC-TZVPP (SMD-acetonitrile) level of theory.....                        | 10 |

|                                                                                                                                                         |    |
|---------------------------------------------------------------------------------------------------------------------------------------------------------|----|
| Figure S11. Molecular orbitals involved at calculated light absorption process of [UO <sub>2</sub> (3-OMe-c-salcn)H <sub>2</sub> O] at 1003 nm. ....    | 11 |
| Figure S12. Molecular orbitals involved at calculated light absorption process of [UO <sub>2</sub> (3-OMe-c-salcn)H <sub>2</sub> O] at 835 nm. ....     | 11 |
| Figure S13. Molecular orbitals involved at calculated light absorption process of [UO <sub>2</sub> (3-OMe-c-salcn)H <sub>2</sub> O] at 612 nm. ....     | 12 |
| Figure S14. Molecular orbitals involved at calculated light absorption processes of [UO <sub>2</sub> (3-OMe-c-salcn)H <sub>2</sub> O] around 411 nm. .. | 13 |

Table S1.  $^1\text{H}$  (400 MHz) and  $^{13}\text{C}$  (100 MHz) data of  $\text{H}_2\text{L}$  and  $[\text{UO}_2(\text{L})\text{H}_2\text{O}]$  in  $\text{DMSO-}d_6$  (25 °C) with tetramethylsilane (TMS), as internal standard (chemical shifts in ppm and  $J$  in Hz).

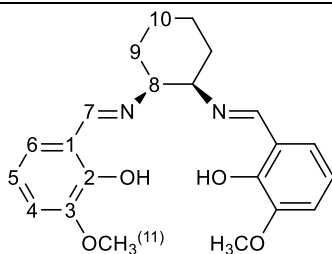

|    | $\text{H}_2\text{L}$    |                          | $[\text{UO}_2(\text{L})\text{H}_2\text{O}]$      |                          |
|----|-------------------------|--------------------------|--------------------------------------------------|--------------------------|
|    | $\delta$ $^1\text{H}$   |                          | $\delta$ $^1\text{H}$                            |                          |
|    | (multiplicity, $J$      | $\delta$ $^{13}\text{C}$ | (multiplicity, $J$                               | $\delta$ $^{13}\text{C}$ |
|    | Hz)                     |                          | Hz)                                              |                          |
| 1  | -                       | 118.35                   | -                                                | 123.7                    |
| 2  | -                       | 151.69                   | -                                                | 159.7                    |
| 3  | -                       | 148.03                   | -                                                | 150.9                    |
| 4  | 7.00 ( <i>m</i> )       | 117.68                   | 7.22 ( <i>dd</i> , 7.8, 1.5)                     | 116.5                    |
| 5  | 6.79 ( <i>t</i> , 7.88) | 114.55                   | 6.61 ( <i>t</i> , 7.8)                           | 115.4                    |
| 6  | 7.00 ( <i>m</i> )       | 123.21                   | 7.25 ( <i>dd</i> , 7.8, 1.5)                     | 126.4                    |
| 7  | 8.55 ( <i>s</i> )       | 165.29                   | 9.40 ( <i>s</i> )                                | 167.8                    |
| 8  | 3.68 ( <i>d</i> , 5.68) | 67.75                    | 4.63-4.55 ( <i>m</i> )                           | 70.6                     |
| 9  | 1.80 ( <i>m</i> ), 1.55 | 30.42                    | 2.40-2.20 ( <i>m</i> )                           | 27.5                     |
| 10 | ( <i>m</i> )            | 21.91                    | 1.88-1.72 ( <i>m</i> )<br>1.68-1.58 ( <i>m</i> ) | 21.4                     |
| 11 | 3.74 ( <i>s</i> )       | 55.62                    | 3.97 ( <i>s</i> )                                | 56.1                     |
| OH | 13.51 ( <i>s</i> )      | -                        | -                                                | -                        |

*s* = singlet, *d* = doublet, *dd* = doublet of doublets, *t* = triplet, *m* = multiplet.

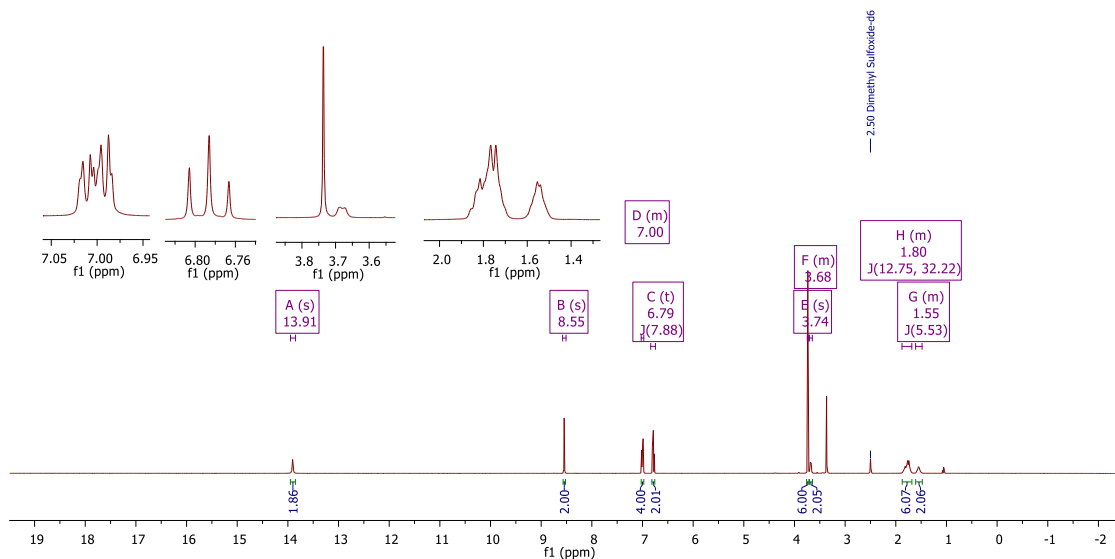

Figure S1.  $^1\text{H}$  NMR spectrum (400 MHz,  $\text{DMSO-}d_6$ ) for 3-OMe-*c*-salcn.

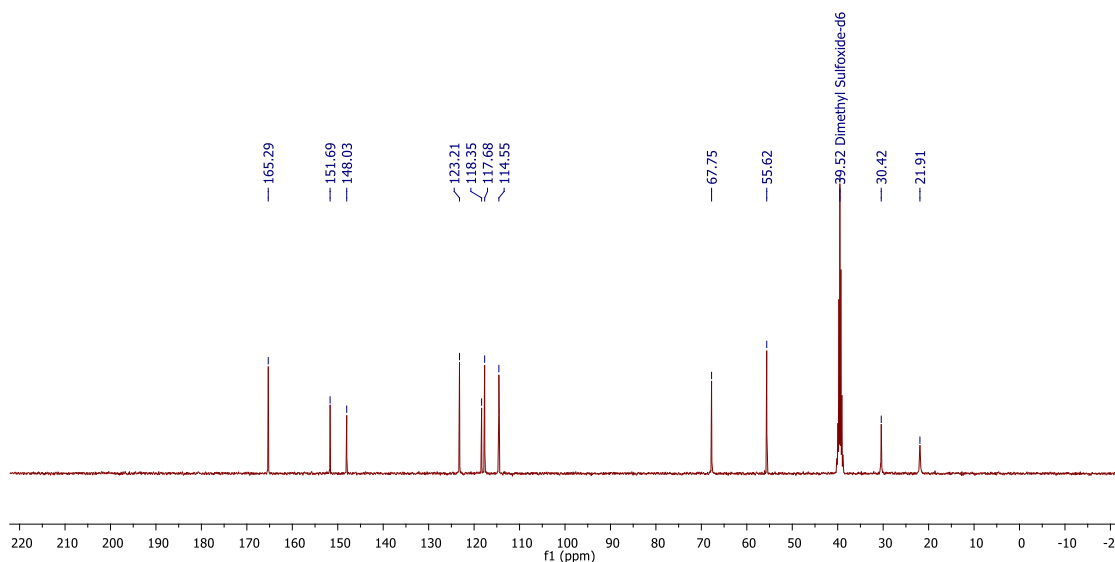

Figure S2.  $^{13}\text{C}$  NMR spectrum (100 MHz,  $\text{DMSO-}d_6$ ) for 3-OMe-*c*-salcn.

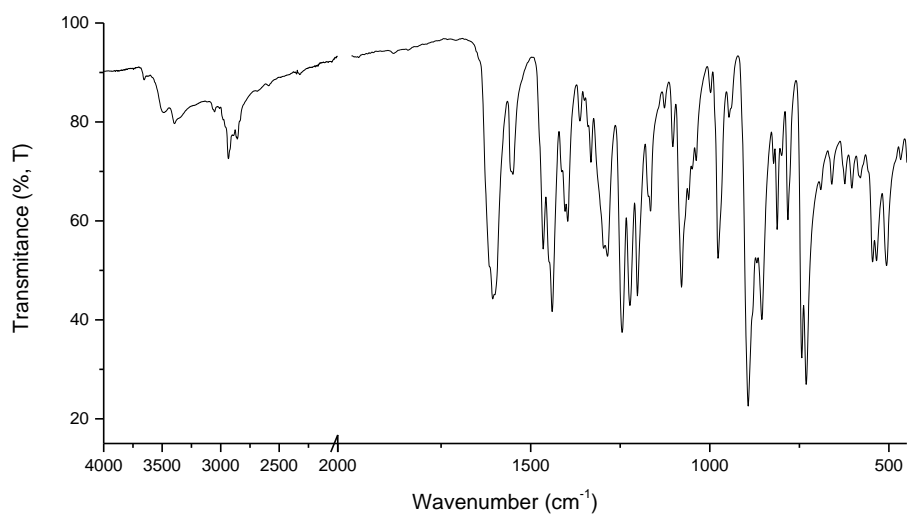

**Figure S3.** Infrared spectra (4000-450  $\text{cm}^{-1}$ , KBr) for  $[\text{UO}_2(3\text{OMe-}c\text{-salcn})\text{H}_2\text{O}]$ .

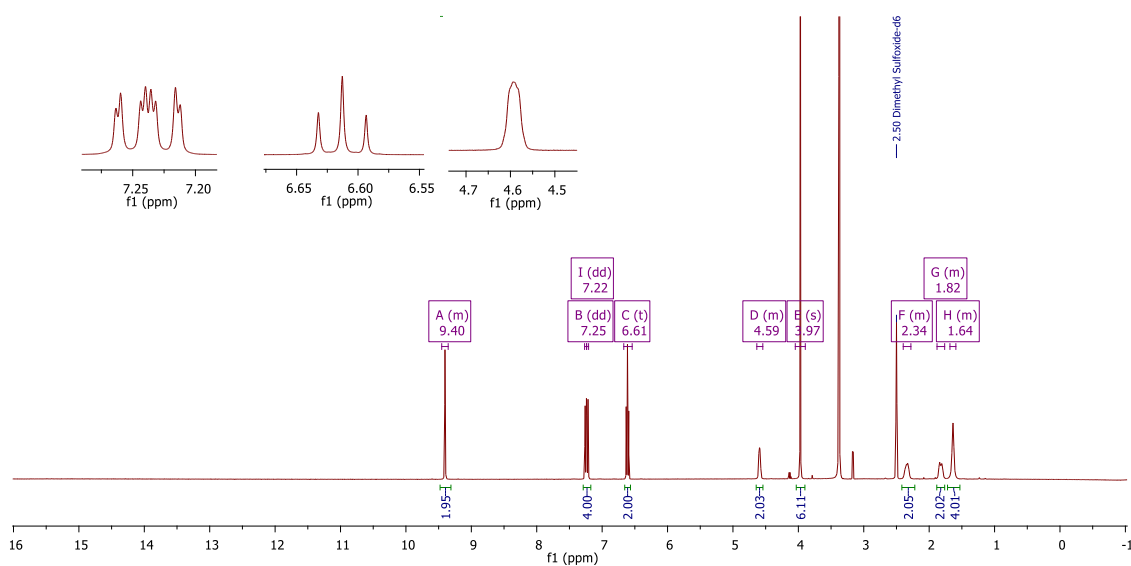

**Figure S4.**  $^1\text{H}$  NMR spectrum (400 MHz,  $\text{DMSO-}d_6$ ) for  $[\text{UO}_2(3\text{OMe-}c\text{-salcn})\text{H}_2\text{O}]$ .

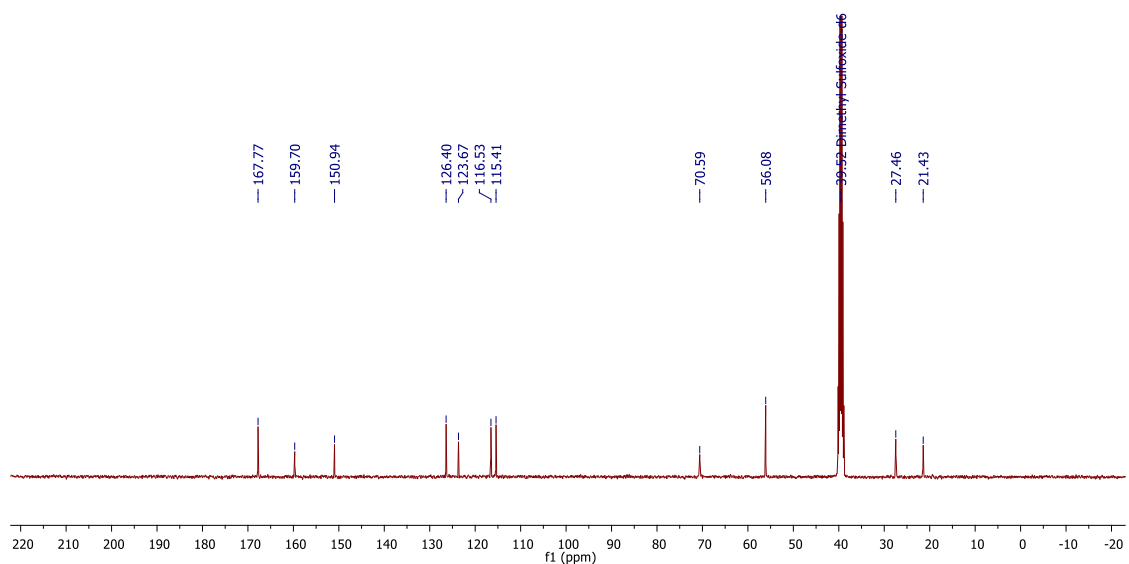

**Figure S5.**  $^{13}\text{C}$  NMR spectrum (400 MHz,  $\text{DMSO-}d_6$ ) for  $[\text{UO}_2(3\text{OMe-}c\text{-salcn})\text{H}_2\text{O}]$ .

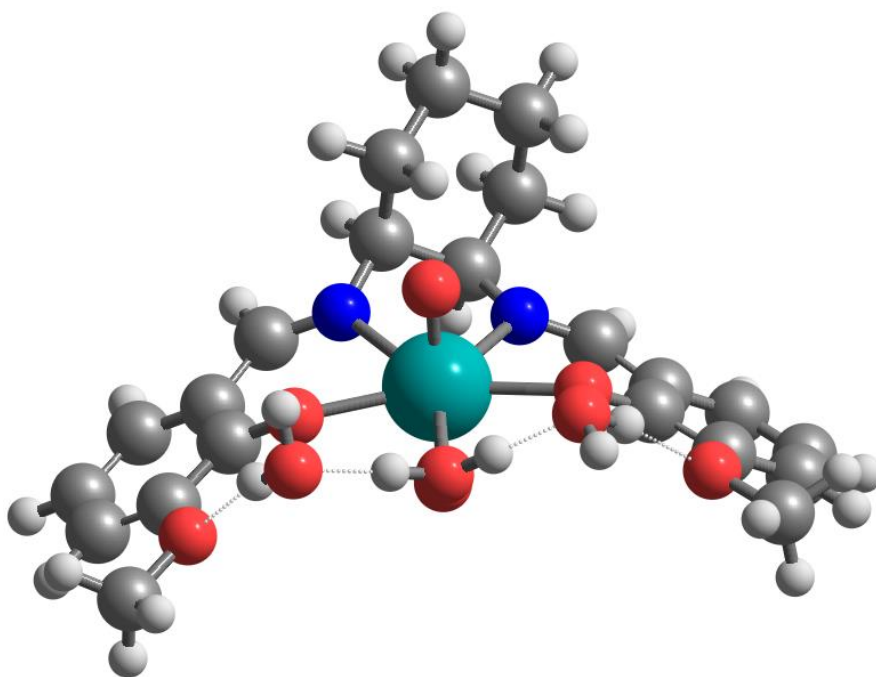

**Figure S6.** Optimized geometry for *cis*- $[\text{UO}_2(3\text{-OMe-}c\text{-salcn})(\text{H}_2\text{O})]$  at DKH-PBE/Def2-TZVPP-D3BJ//SARC-TZVPP level of theory.

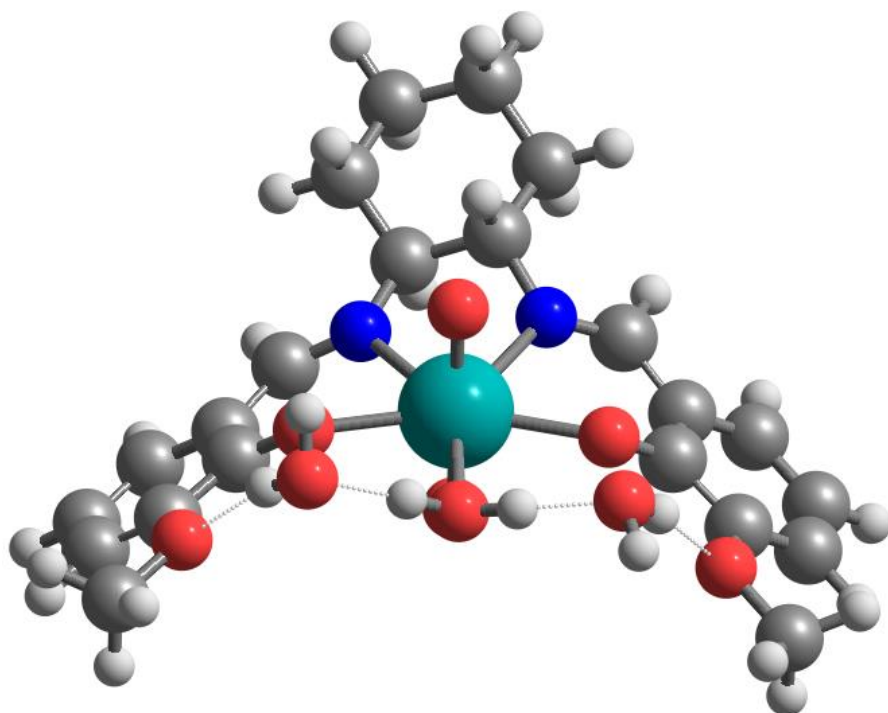

**Figure S7.** Optimized geometry for *trans*-[UO<sub>2</sub>(3-OMe-*c*-salcn)(H<sub>2</sub>O)] at DKH-PBE/Def2-TZVPP-D3BJ//SARC-TZVPP level of theory.

**Table S2.** Experimental (190-800 nm, Acetonitrile, 25°C) and theoretical (ZORA-PBE/Def2-TZVPP-3BJ//SARC-TZVPP - SMD-Acetonitrile) UV-Vis attribution ( $\lambda$  in nm and  $\epsilon$  in L<sup>•</sup>mol<sup>-1</sup>•cm<sup>-1</sup>).

| Comp                                  | Experimental                   |                                 |                                |                                 | Theoretical<br>$\lambda_{\text{m\acute{a}x}}$ | Assignment                                                     |
|---------------------------------------|--------------------------------|---------------------------------|--------------------------------|---------------------------------|-----------------------------------------------|----------------------------------------------------------------|
|                                       | Observed                       |                                 | G. A                           |                                 |                                               |                                                                |
|                                       | $\lambda_{\text{m\acute{a}x}}$ | $\epsilon_{\text{m\acute{a}x}}$ | $\lambda_{\text{m\acute{a}x}}$ | $\epsilon_{\text{m\acute{a}x}}$ |                                               |                                                                |
| [UO <sub>2</sub> (L)H <sub>2</sub> O] |                                |                                 |                                |                                 | 1003                                          | LMCT<br>( $p\pi \rightarrow f\pi$ )                            |
|                                       |                                |                                 |                                |                                 | 835                                           | LMCT                                                           |
|                                       |                                |                                 |                                |                                 | 616                                           | LMCT<br>( $p\pi \rightarrow f\pi$ )                            |
|                                       |                                |                                 | 482                            | 33                              |                                               | -                                                              |
|                                       | 344                            | 7311                            | 401                            | 1900                            | 411                                           | LMCT<br>( $p\pi \rightarrow f\pi$ )<br>$\pi \rightarrow \pi^*$ |



|     |       |     |       |                               |
|-----|-------|-----|-------|-------------------------------|
|     |       | 347 | 4400  | LMCT                          |
|     |       | 282 | 10300 | LMCT                          |
| 268 | 21500 | 268 | 8800  | $\pi \rightarrow \pi^*$ (N=C) |
|     |       | 239 | 31600 | $\pi \rightarrow \pi^*$ (C=C) |
| 236 | 61000 | 229 | 35900 | $\pi \rightarrow \pi^*$ (C=C) |

### G.A - Gaussian analysis

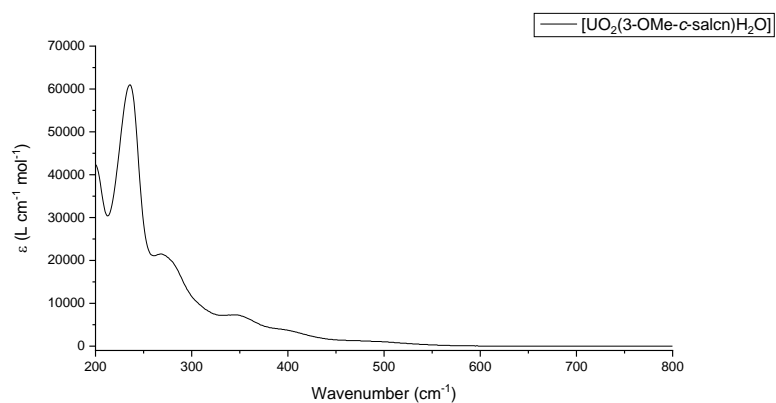

**Figure S8.**  $[UO_2(3-OMe-c-salcn)H_2O]$  UV-Vis electronic spectra (200-800 nm, acetonitrile, 25°C).

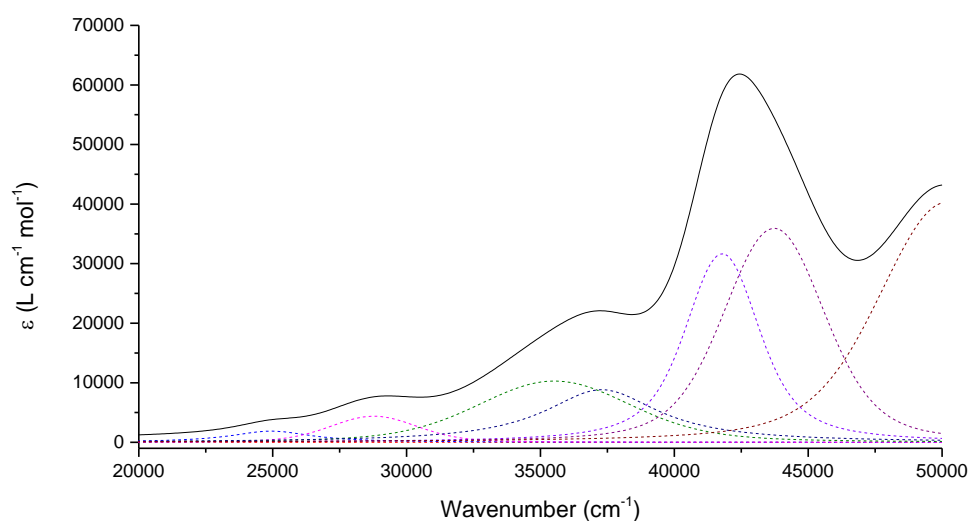

**Figure S9.** Gaussian analysis of  $[\text{UO}_2(3\text{-OMe-}c\text{-salcn})\text{H}_2\text{O}]$  for electronic spectrum in the  $50000\text{-}20000\text{ cm}^{-1}$  ( $200\text{-}500\text{ nm}$ , Acetonitrile,  $25^\circ\text{C}$ ) region.

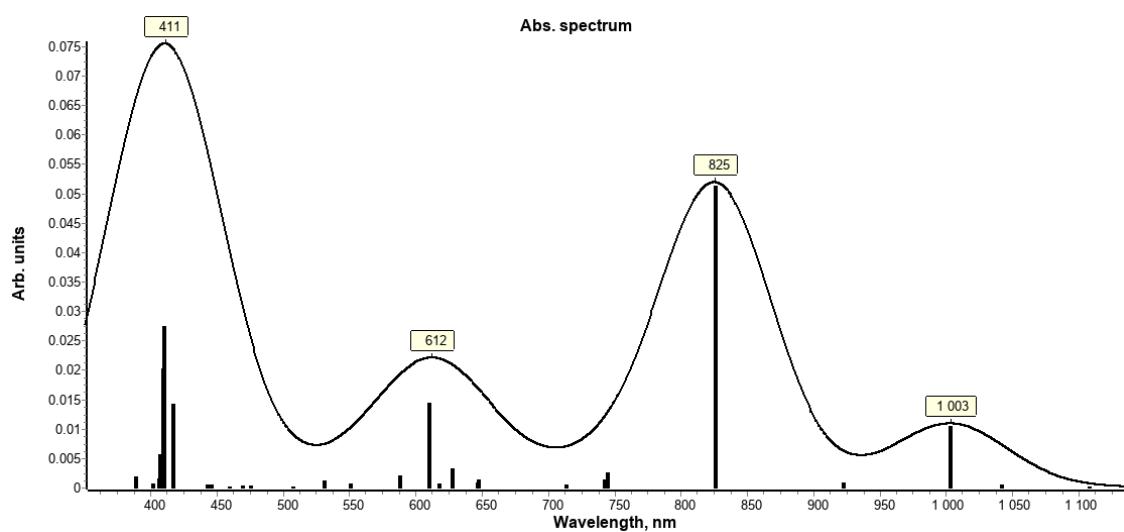

**Figure S10.** UV-VIS spectrum for  $[\text{UO}_2(3\text{-OMe-}c\text{-salcn})\text{H}_2\text{O}]$  calculated at ZORA-PBE/Def2-TZVPP-3BJ//SARC-TZVPP (SMD-acetonitrile) level of theory.

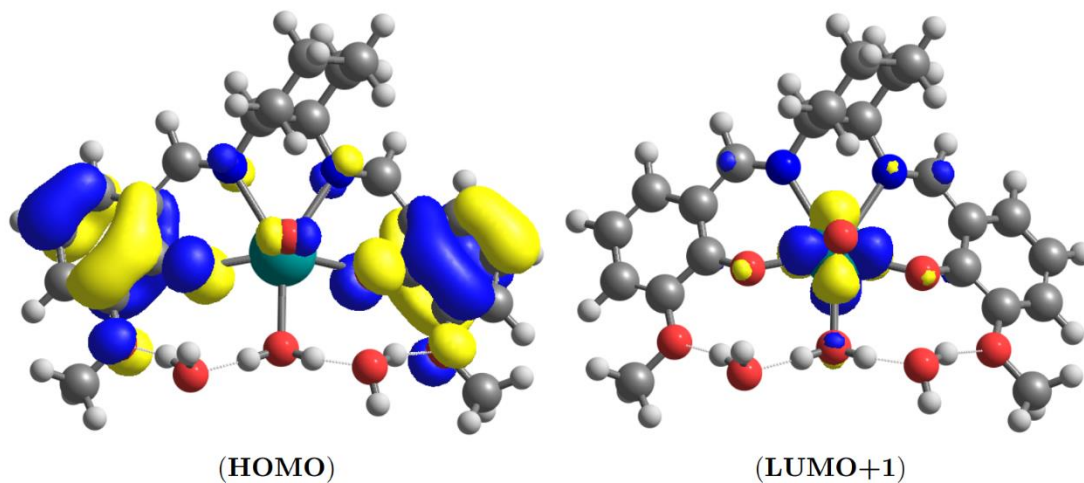

**Figure S11.** Molecular orbitals involved at calculated light absorption process of  $[UO_2(3-OMe-c-salcn)H_2O]$  at 1003 nm.

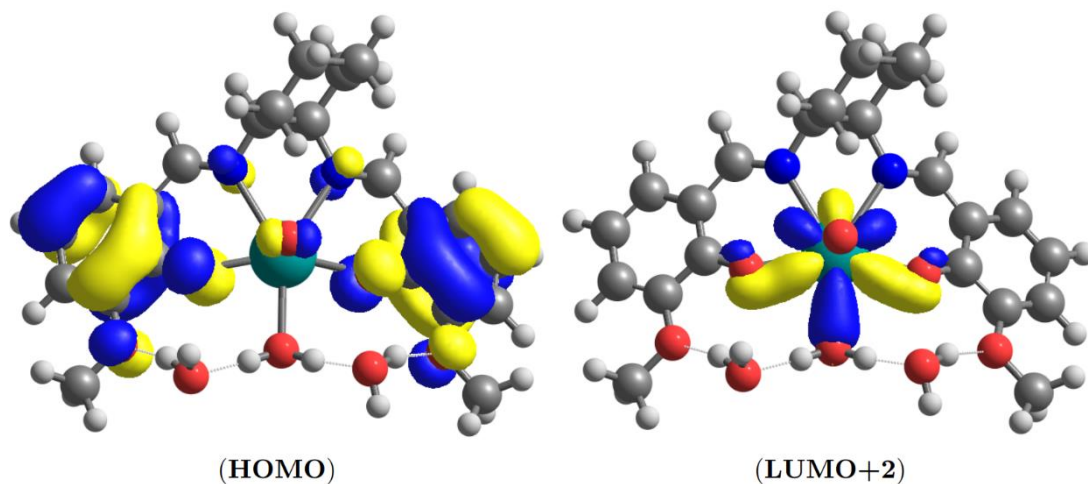

**Figure S12.** Molecular orbitals involved at calculated light absorption process of  $[UO_2(3-OMe-c-salcn)H_2O]$  at 835 nm.

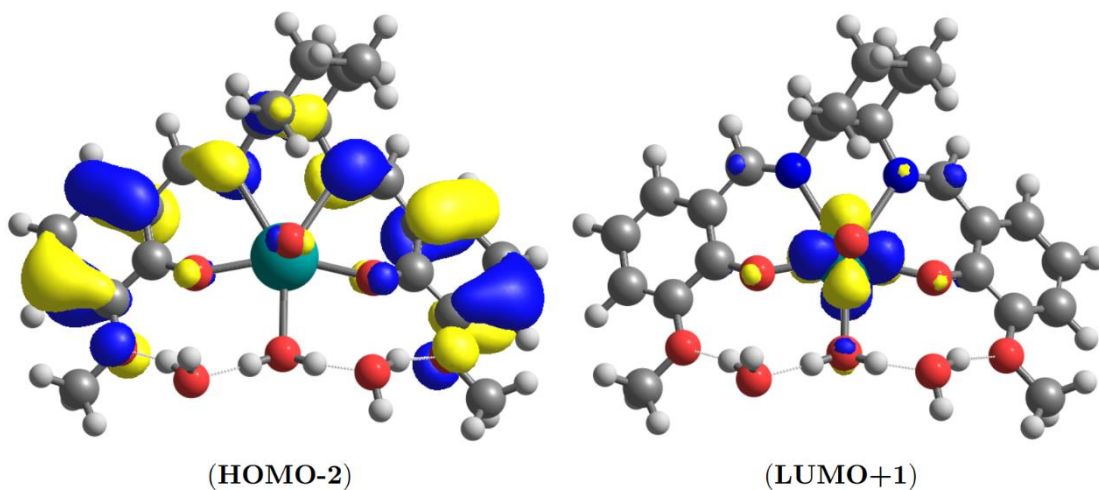

**Figure S13.** Molecular orbitals involved at calculated light absorption process of [UO<sub>2</sub>(3-OMe-c-salcn)H<sub>2</sub>O] at 612 nm.

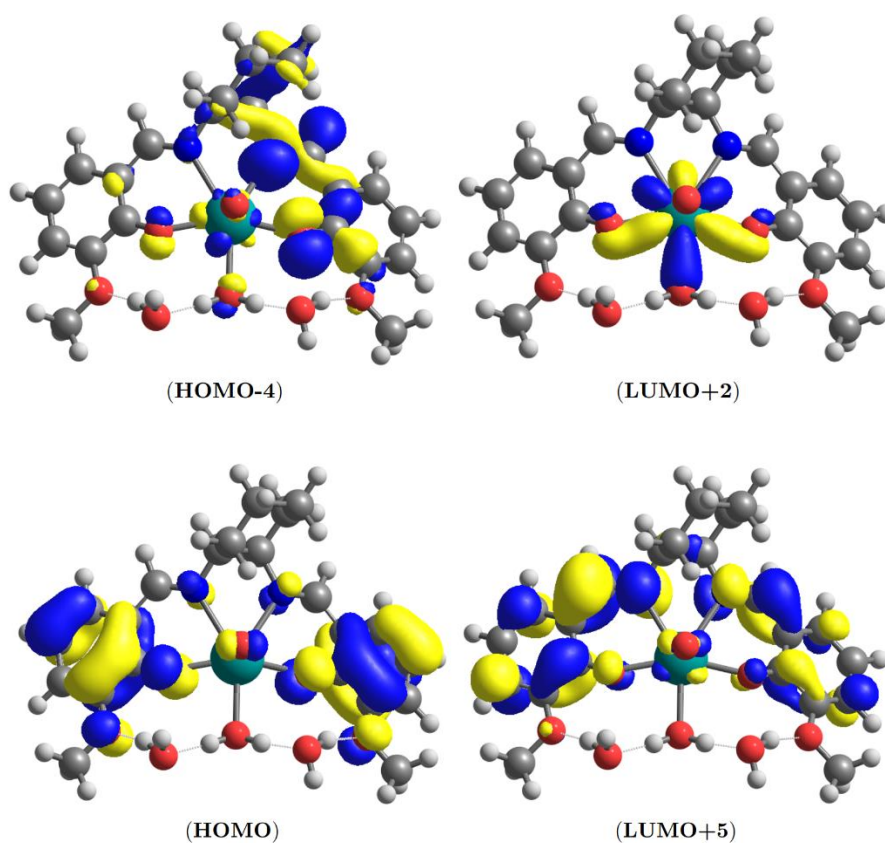

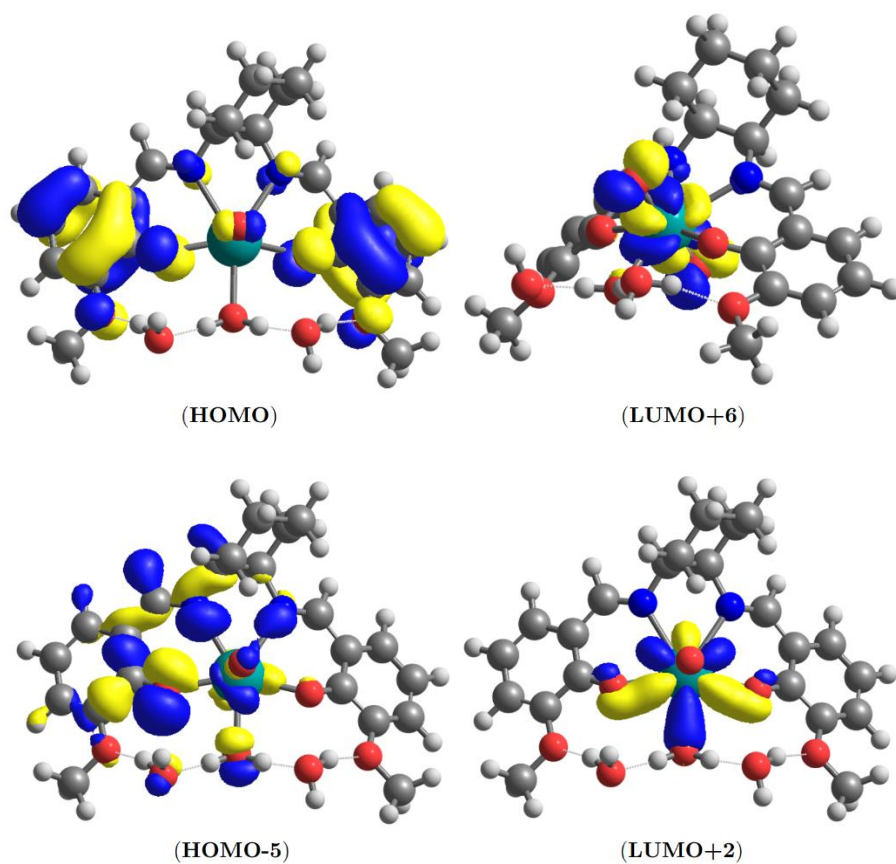

**Figure S14.** Molecular orbitals involved at calculated light absorption processes of  $[UO_2(3-OMe-c-salcn)H_2O]$  around 411 nm.
